# Supplementary material
Source: PubMed Central journal article supplement (PMC11028555)
Supplement: 262_2014_1554_MOESM1_ESM.pdf [file 262_2014_1554_MOESM1_ESM.pdf]

## Supplementary Figure S1.

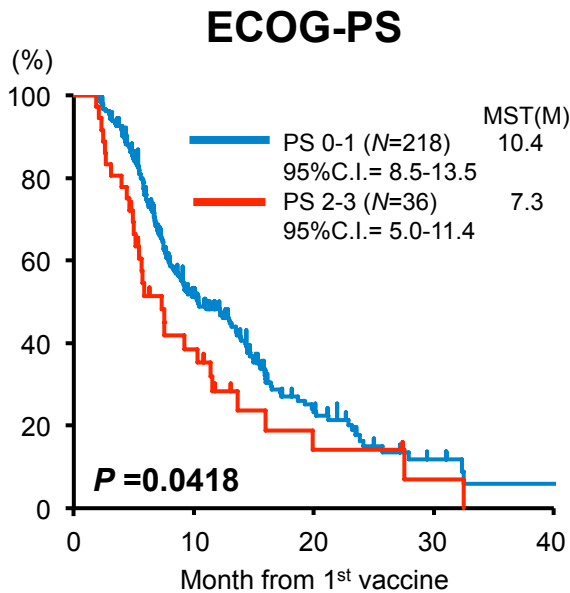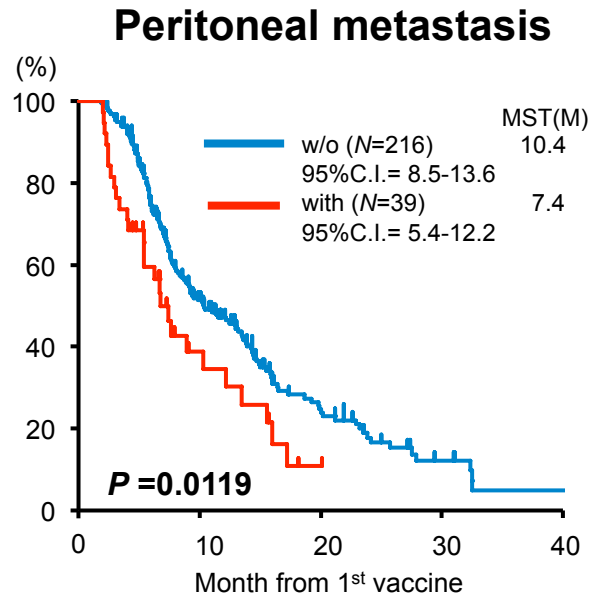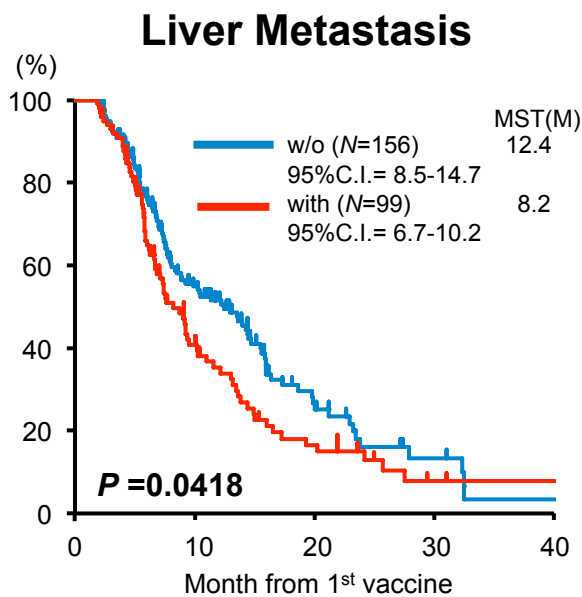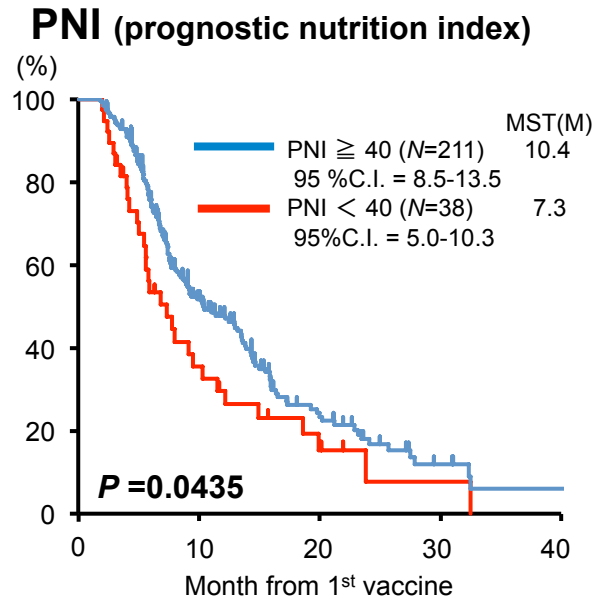

## Supplementary Figure S1.

Kaplan-Meier plots for the patients' baseline factors that significantly affected the overall survival from the 1st DC vaccination. Survival curves were plotted using the Kaplan-Meier method, and survival curve comparisons were conducted with the log-rank test. The significance of results was accepted at P-values <0.05.

Supplementary Table S1. Patients' baseline characteristics

|                                                      | OK432            |                  | P-value |
|------------------------------------------------------|------------------|------------------|---------|
|                                                      | with (n=186)     | without (n=69)   |         |
| Age (year)                                           |                  |                  |         |
| Median (range)                                       | 63 (27-84)       | 63 (34-75)       | 0.86    |
| Gender – no. (%)                                     |                  |                  |         |
| Male                                                 | 100 (54)         | 35 (51)          | 0.67    |
| Female                                               | 86 (46)          | 34 (49)          |         |
| ECOG performance status score – no. (%)              |                  |                  |         |
| 0                                                    | 41 (22)          | 18 (26)          | 0.61    |
| 1                                                    | 115 (62)         | 44 (64)          |         |
| 2                                                    | 26 (14)          | 5 (7)            |         |
| 3                                                    | 3 (2)            | 1 (1)            |         |
| 4                                                    | 1 (1)            | 0 (0)            |         |
| NA                                                   | 0 (0)            | 1 (1)            |         |
| Clinical stage – no. (%)                             |                  |                  |         |
| locally invasive                                     | 62               | 16               | 0.13    |
| metastasis                                           | 124              | 53               |         |
| Laboratory data at leukapheresis (mean ± S.D.)       |                  |                  |         |
| WBC (/mL)                                            | 5345 (±2022)     | 5721 (±2408)     | 0.28    |
| No. of lymphocytes (/mL)                             | 1266 (±505)      | 1410 (±645)      | 0.17    |
| Hemoglobin (g/dL)                                    | 11.5 (±1.7)      | 11.2 (±1.4)      | 0.20    |
| Albumin (g/dL)                                       | 3.9 (±0.5)       | 3.9 (±0.5)       | 0.87    |
| CRP (mg/dL)                                          | 0.94 (±1.8)      | 0.65 (±1.3)      | 0.11    |
| WT1 A*2402/*0201/*0206 (%)                           | 149 (80)         | 58 (84)          | 0.59    |
| MUC1 (%)                                             | 166 (89)         | 60 (87)          | 0.51    |
| Time to start DC vaccination from diagnosis (months) |                  |                  |         |
| Median (range)                                       | 3.9 (1-36)       | 4.3 (1-31)       | 0.57    |
| Number of DC vaccines (/leukapheresis)               |                  |                  |         |
| Median (range)                                       | 7 (5-55)         | 8 (5-38)         | 0.60    |
| Viability of DC vaccines (%)                         |                  |                  |         |
| Median (range)                                       | 84.0 (42.0-95.8) | 86.5 (45.3-97.5) | 0.18    |
| Standard therapy combined with DC vaccine – no. (%)  |                  |                  |         |
| Chemotherapy                                         |                  |                  |         |
| GEM                                                  | 100 (54)         | 35 (51)          | 0.34    |
| GEM+S-1                                              | 41 (22)          | 22 (32)          |         |
| S-1                                                  | 34 (18)          | 10 (14)          |         |
| others                                               | 11(6)            | 2 (3)            |         |
| Radiotherapy                                         | 10 (5)           | 2 (3)            | 0.43    |
